# Supplementary material for: Quality Control of Next-generation Sequencing-based In vitro Diagnostic Test for Onco-relevant Mutations Using Multiplex Reference Materials in Plasma
Source: PubMed Central journal article supplement — J Cancer. 2018 Apr 18;9(9):1680–8. doi: 10.7150/jca.24126 (PMC5950598; doi:10.7150/jca.24126), 2018-04-18
Supplement: jcav09p1680s1.pdf [file jcav09p1680s1.pdf]

## SUPPLEMENTARY FILE

**Table S1** Primers used for the amplification of mutant fragments

| Primers  | Direction | Sequences                      |
|----------|-----------|--------------------------------|
| 19del    | Forward   | 5'-TGGGCAGCATGTGGCACCATCT-3'   |
|          | Reverse   | 5'-CATGGACCCCCACA-3'           |
| *L858R-1 | Forward   | 5'-GTCCCTCACAGCAGGGTCTTC-3'    |
|          | Reverse   | 5'-CTTTGCCTCCTTCTGCATGGTAT-3'  |
| *L858R-2 | Forward   | 5'-GGCAGCCAGGAACGTACTGGTG-3'   |
|          | Reverse   | 5'-TGTCAGGAAAATGCTGGCTGACCT-3' |
| T790M    | Forward   | 5'-CCTCCTTCTGGCCACCATGC-3'     |
|          | Reverse   | 5'-CCAATATTGTCTTTGTGTTCCCGG-3' |

\*L858R-1 and L858R-2 fragments detect the same exon 21 L858R mutation site. The only difference was the length of nucleotides next to the mutation site.

**Table S2** The information of the NGS-based cancer IVDs of the eight participants

| # | ctDNA extraction                                  | FFPE extraction                        | DNA fragmentation                                | Isolation technique | Quality control                                                                                             | Sequencing platform            | Minimum ctDNA quantity (ng) | Minimum FFPE quantity (ng) | Read length (bp) | Sequencing kit                                             |
|---|---------------------------------------------------|----------------------------------------|--------------------------------------------------|---------------------|-------------------------------------------------------------------------------------------------------------|--------------------------------|-----------------------------|----------------------------|------------------|------------------------------------------------------------|
| 1 | QIAamp Circulating Nucleic Acid Kit (Qiagen)      | QIAamp DNA FFPE Tissue Kit (Qiagen)    | NEBNext dsDNA Fragmentase (NEB)                  | Hybrid capture      | Qubit 2.0 and ABI7500 Real-Time PCR system (ThermoFisher)                                                   | NextSeq CN500 (Berry Genomics) | 10                          | 120                        | 2x150            | NextSeq 500 Mid Output Kit v2 (300 cycles) (Illumina)      |
| 2 | QIAseq cfDNA All-in-One Kit (Qiagen)              | TIANamp FFPE DNA kit (Tiangen)         | LE220 High Performance Ultra-sonicator (Covaris) | Hybrid capture      | LabChip GX Touch HT Capillary Electrophoresis (PerkinElmer) and ABI7500 Real-Time PCR system (ThermoFisher) | NextSeq 500 (Illumina)         | 30                          | 500                        | 2x150            | NextSeq 500 Mid Output Kit v2 (150 cycles) (Illumina)      |
| 3 | MagMAX Cell-Free DNA Isolation Kit (ThermoFisher) | blackPREP FFPE DNA Kit (Analytik Jena) | Covaris M220 (Covaris)                           | Hybrid capture      | Agilent Bioanalyzer 2100 (Agilent Tech), Qubit 3.0, and ABI7500 Real-Time PCR system (ThermoFisher)         | HiSeq X Ten (Illumina)         | 10                          | N/A                        | 2x150            | HiSeq Ten Reagent Kit v2.5 (Illumina)                      |
| 4 | QIAamp Circulating Nucleic Acid Kit (Qiagen)      | GeneRead DNA FFPE kit (Qiagen)         | QIAseq FX DNA Library Kit (Qiagen)               | Hybrid capture      | Agilent 4200 TapeStation Instrument (Agilent Tech)                                                          | NextSeq 500 (Illumina)         | 40                          | 300                        | 2x150            | NextSeq 500/550 High Output Kit v2 (300 cycles) (Illumina) |
| 5 | GenoPrep                                          | QIAamp                                 | N/A                                              | Multiplex           | Qubit 2.0                                                                                                   | Ion Proton                     | 10                          | 10                         | 200              | Ion AmpliSeq                                               |

|   |                                                   |                                     |                                         |                |                                                                                                          |                          |    |     |                |                                                          |
|---|---------------------------------------------------|-------------------------------------|-----------------------------------------|----------------|----------------------------------------------------------------------------------------------------------|--------------------------|----|-----|----------------|----------------------------------------------------------|
|   | DNA extraction kit (Genosaber)                    | DNA FFPE Tissue Kit (Qiagen)        |                                         | PCR            | (ThermoFisher) and Agilent 4200 TapeStation Instrument (Agilent Tech)                                    | (ThermoFisher)           |    |     |                | (Thermo Fisher)                                          |
| 6 | MagMAX Cell-Free DNA Isolation Kit (ThermoFisher) | QIAamp DNA FFPE Tissue Kit (Qiagen) | Bioruptor sonication system (Diagenode) | Hybrid capture | Agilent Bioanalyzer 2100 (Agilent Tech), and LabChip GX Touch HT Capillary Electrophoresis (PerkinElmer) | NextSeq 550AR (Annoroad) | 10 | 500 | *2x150<br>2x75 | NextSeq 550 High Output Kit (Illumina)                   |
| 7 | QIAamp Circulating Nucleic Acid Kit (Qiagen)      | QIAamp DNA FFPE Tissue Kit (Qiagen) | Bioruptor sonication system (Diagenode) | Hybrid capture | Agilent 4200 TapeStation Instrument (Agilent Tech), and ABI7500 Real-Time PCR system (Thermo Fisher)     | NextSeq 500 (Illumina)   | 15 | 50  | 2x75           | NextSeq 500 High Output Kit (Illumina)                   |
| 8 | QIAamp Circulating Nucleic Acid Kit (Qiagen)      | QIAamp DNA FFPE Tissue Kit (Qiagen) | NEBNext dsDNA Fragmentase (NEB)         | Hybrid capture | Agilent Bioanalyzer 2100 (Agilent Tech), and Qubit 2.0 (ThermoFisher)                                    | BGISEQ-500 (BGI)         | 10 | 100 | 2x50           | BGISEQ-500RS High-throughput sequencing kit (PE50) (BGI) |

\*The read length of participant #6 was 2? 50bp for plasma and 2? 5bp for FFPE samples.

Abbreviations: ctDNA, circulating tumor deoxyribonucleic acid; FFPE, formalin-fixed, paraffin-embedded; bp, base pair; N/A, not applicable.

**Table S3** Testing parameters of the eight participants

| #        | Average depth of coverage |        |        |        |        | Q20 (%)          |                  |                  |                  |                  | On-target rate (%) |       |       |       |       |
|----------|---------------------------|--------|--------|--------|--------|------------------|------------------|------------------|------------------|------------------|--------------------|-------|-------|-------|-------|
|          | Plasma                    |        |        | FFPE   |        | Plasma           |                  |                  | FFPE             |                  | Plasma             |       |       | FFPE  |       |
|          | Q0                        | Q1     | Q2     | Q1     | Q2     | Q0               | Q1               | Q2               | Q1               | Q2               | Q0                 | Q1    | Q2    | Q1    | Q2    |
| <b>1</b> | 2173                      | 338    | 697    | 554    | 875    | *99.96/<br>99.63 | *99.96/<br>99.60 | *99.96/<br>99.62 | *99.96/<br>99.56 | *99.97/<br>99.61 | 93.88              | 93.54 | 93.89 | 93.18 | 93.22 |
| <b>2</b> | 4200                      | 4100   | 4200   | 4800   | 6100   | NE               | NE               | NE               | NE               | NE               | 20.00              | 19.00 | 20.00 | 21.00 | 22.00 |
| <b>3</b> | 13152                     | 13160  | 7756   | NE     | NE     | 52.38            | 49.14            | 49.08            | 48.99            | 49.09            | 86.78              | 86.73 | 86.54 | NE    | NE    |
| <b>4</b> | 2467                      | 2850   | 3014   | 2913   | 1732   | NE               | NE               | NE               | NE               | NE               | 34.91              | 26.16 | 26.84 | 60.26 | 61.72 |
| <b>5</b> | 376000                    | 351000 | 408000 | 446000 | 421000 | 80.04            | 80.39            | 78.38            | 79.32            | 73.02            | 97.36              | 97.08 | 95.93 | 99.84 | 99.83 |
| <b>6</b> | 2580                      | 2351   | 2367   | 2343   | 2356   | 90.02            | 89.53            | 88.92            | 94.88            | 94.51            | 15.42              | 15.23 | 15.37 | 17.50 | 17.22 |
| <b>7</b> | 4863                      | 5260   | 4981   | 941    | 1004   | NE               | NE               | NE               | NE               | NE               | 43.04              | 43.20 | 40.73 | 18.89 | 25.28 |
| <b>8</b> | 3252                      | 3156   | 3531   | 862    | 841    | NE               | NE               | NE               | NE               | NE               | 26.15              | 25.85 | 25.68 | 21.25 | 21.52 |

\*Two values of Q20 were presented in participant #1 as bi-directional sequencing was used.  
Abbreviations: FFPE, formalin-fixed, paraffin-embedded; NE, not evaluated.

**Table S4** Number of reads of each target mutation of the eight participants

| #        | 19del reads (wild-type/mutant) |               |                 |                |               | L858R reads (wild-type/mutant) |                 |                 |                 |                  | T790M reads (wild-type/mutant) |               |               |               |                |
|----------|--------------------------------|---------------|-----------------|----------------|---------------|--------------------------------|-----------------|-----------------|-----------------|------------------|--------------------------------|---------------|---------------|---------------|----------------|
|          | Plasma                         |               |                 | FFPE           |               | Plasma                         |                 |                 | FFPE            |                  | Plasma                         |               |               | FFPE          |                |
|          | Q0                             | Q1            | Q2              | Q1             | Q2            | Q0                             | Q1              | Q2              | Q1              | Q2               | Q0                             | Q1            | Q2            | Q1            | Q2             |
| <b>1</b> | 2083/1                         | N/A           | 453/7           | 516/7          | 452/22        | 2224/23                        | N/A             | 817/29          | 657/16          | 605/55           | 1451/12                        | N/A           | 811/36        | 462/9         | 262/22         |
| <b>2</b> | N/A                            | 4417/6        | 4369/9          | 4961/38        | 6415/<br>204  | 4752/47                        | 4514/46         | 4721/60         | 4627/76         | 6108/<br>421     | 4436/9                         | 4214/4        | 4183/11       | 4544/80       | 6239/<br>472   |
| <b>3</b> | 16373/<br>127                  | 17025/<br>107 | 9973/<br>147    | N/A            | N/A           | 16022/<br>92                   | 16270/<br>252   | 9956/<br>336    | N/A             | N/A              | 14903/<br>108                  | 15412/<br>141 | 8238/<br>229  | N/A           | N/A            |
| <b>4</b> | 4357/8                         | 3061/17       | 4053/70         | 4224/53        | 2222/84       | 2682/49                        | 2532/81         | 3453/88         | 3394/64         | 1978/<br>164     | 2126/5                         | 2344/38       | 3161/<br>160  | 2325/52       | 1490/<br>113   |
| <b>5</b> | 149700/<br>300                 | 87422/<br>404 | 134927/<br>1047 | 109528/<br>993 | 12747/<br>348 | 320394/<br>1296                | 255327/<br>2635 | 354268/<br>7611 | 265395/<br>4334 | 237598/<br>16258 | 52295/<br>121                  | 36609/<br>183 | 41254/<br>553 | 26319/<br>396 | 31321/<br>1726 |
| <b>6</b> | 4082/45                        | 3439/36       | 3653/18         | N/A            | N/A           | 3240/28                        | 2885/48         | 2899/<br>188    | 2087/32         | 2142/<br>121     | 2186/3                         | 2055/51       | 2338/<br>168  | 2426/48       | 2501/<br>197   |
| <b>7</b> | 5284/0                         | 5924/9        | 5518/24         | 1057/6         | 1108/22       | 5385/70                        | 6115/<br>134    | 6126/<br>162    | 955/15          | 1086/89          | 6051/31                        | 6474/69       | 6785/<br>123  | 954/20        | 1134/89        |
| <b>8</b> | 3891/0                         | 3701/0        | 4105/0          | 861/9          | 813/64        | 3026/8                         | 3024/22         | 3288/32         | 558/11          | 480/38           | 6335/14                        | 5602/19       | 6156/60       | 798/10        | 747/57         |

Abbreviations: del, deletion; T, threonine; M, methionine; L, leucine; R, arginine; FFPE, formalin-fixed, paraffin-embedded; NE, not evaluated.

**Figure S1** The workflow of the preparation of reference materials

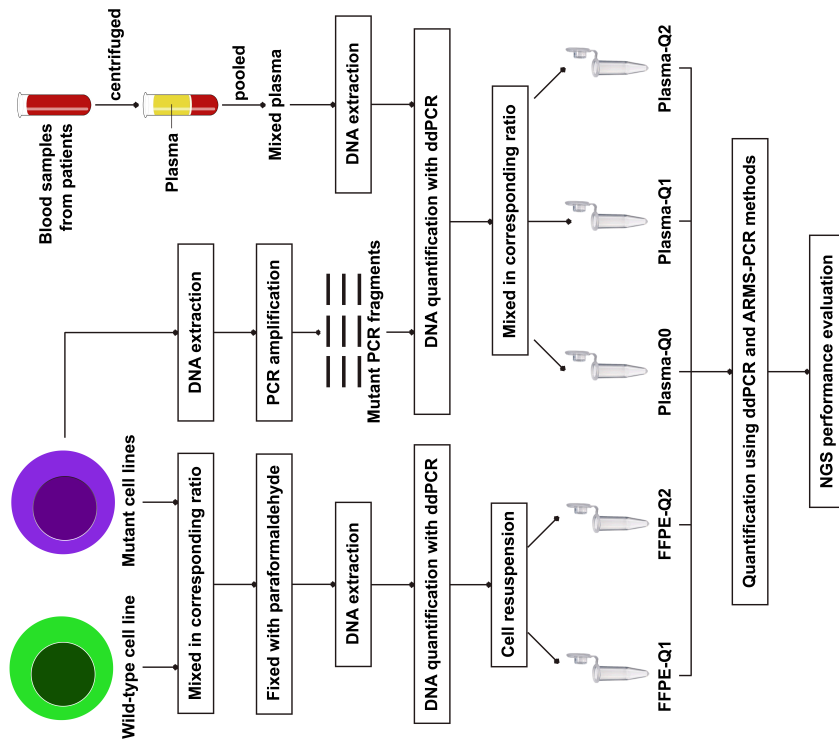

For the preparation of FFPE reference materials, wildtype cells were spiked with mutant cells and the mixtures were then fixed with paraformaldehyde. For the preparation of plasma reference materials, nucleic acid fragments containing 19del, L858R or T790M mutations were amplified from the gDNA of H1650 and H1975 cell lines using corresponding primers and were spiked into pooled plasma.
